# Supplementary material
Source: PubMed Central journal article supplement (PMC2889345)
Supplement: 1000373107_pnas.201000373SI.pdf [file 1000373107_pnas.201000373SI.pdf]

# Supporting Information

Morris et al. 10.1073/pnas.1000373107

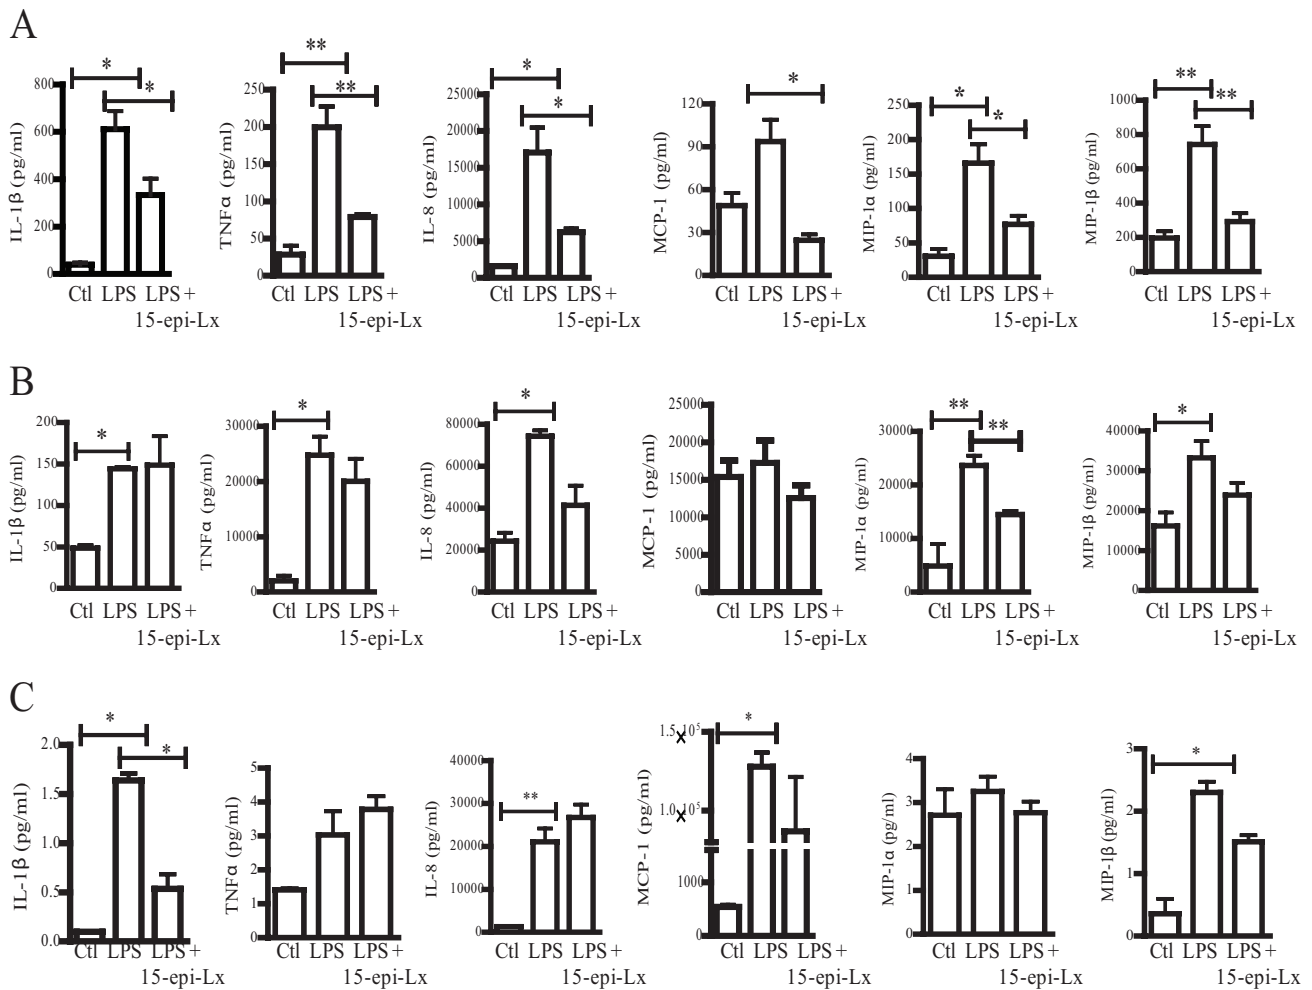

**Fig. S1.** Inhibitory effect of 15-epi-LxA<sub>4</sub> on inflammatory cytokine/chemokine synthesis from LPS-stimulated human monocytes (A), monocyte-derived macrophages (B), and HUVECs (C). Data are presented as mean  $\pm$  SEM; \**P* < 0.05 and \*\**P* < 0.01.

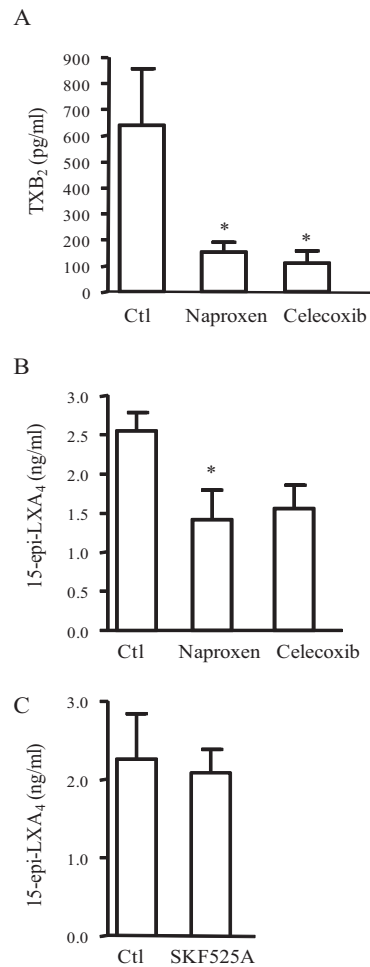

**Fig. S2.** Plasma levels of 15-epi-LxA<sub>4</sub> are inhibited by COX inhibition in naive animals. Naproxen and celecoxib were dosed at 10 mg/kg for 3 d, followed by plasma measurements of TxB<sub>2</sub> (A), the active metabolite of TxA<sub>2</sub>; and 15-epi-LxA<sub>4</sub> (B). (C) No effect on plasma 15-epi-LxA<sub>4</sub> was found with the cytochrome P450 inhibitor SKF525A (twice daily for 3 d at 30 mg/kg). Data were analyzed by ANOVA followed by Bonferroni t test and presented as mean ± SEM; \**P* < 0.05.

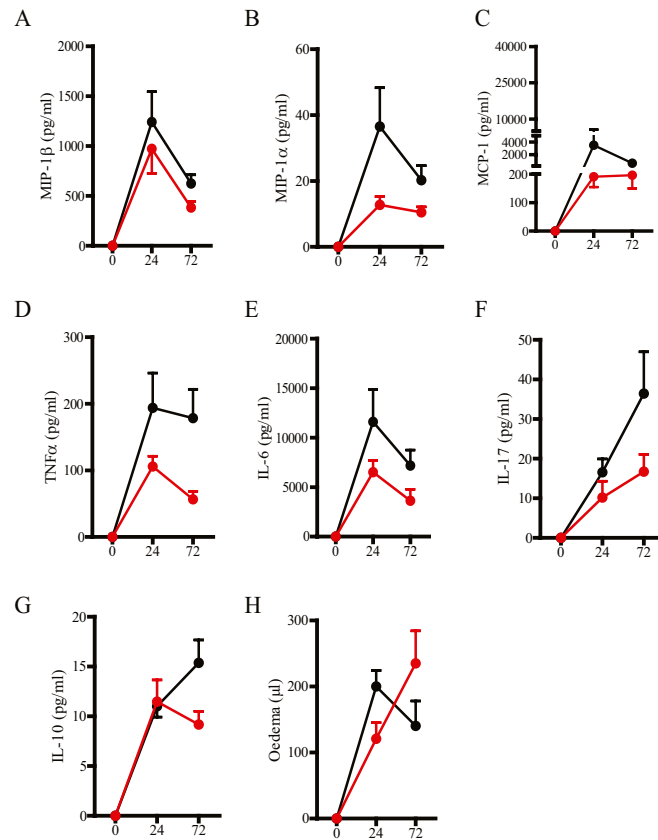

**Fig. S3.** Whereas ASA<sup>low</sup> (solid red line) inhibited IL-1 $\beta$  and IL-8 in the blister fluid of volunteers possessing an early resolving phenotype (Fig. 4 E and F in the main text), it had a trend toward but no significant reduction in levels of a range of inflammatory cytokines (A–G) and blister edema (H). Black solid line represents controls.
